# Supplementary material for: Mapping of susceptibility loci for Ebola virus pathogenesis in mice
Source: PubMed Central journal article supplement — Cell Rep. Author manuscript; Available in PMC 2024 Aug 27. (PMC11348656; doi:10.1016/j.celrep.2024.114127), 2024-04-21
Supplement: NIHMS2000495-supplement-1.pdf [file NIHMS2000495-supplement-1.pdf]

## Supplemental information

### Mapping of susceptibility loci for Ebola virus pathogenesis in mice

**Alexandra Schäfer, Andrea Marzi, Wakako Furuyama, Nicholas J. Catanzaro, Cameron Nguyen, Elaine Haddock, Friederike Feldmann, Kimberly Meade-White, Tina Thomas, Miranda L. Hubbard, Kendra L. Gully, Sarah R. Leist, Pablo Hock, Timothy A. Bell, Gabriela E. De la Cruz, Bentley R. Midkiff, David R. Martinez, Ginger D. Shaw, Darla R. Miller, Michael J. Vernon, Rachel L. Graham, Dale O. Cowley, Stephanie A. Montgomery, Klaus Schughart, Fernando Pardo Manuel de Villena, Gregory K. Wilkerson, Martin T. Ferris, Heinz Feldmann, and Ralph S. Baric**

## Supplemental Figures

### Figure S1. Different disease severity of CC011 and CC074 after MA-EBOV infection. **A.**

Gross pathology scores in the liver of CC011 and CC074 on a scale from 0 (no change) to 4 (100% changed) (n=16 for each strain, both sexes). **B.** Representative images (20x and 40x, respectively) of the fibrinogen, cleaved caspase 3 (apoptosis), and CD31 (endothelial marker)

immunostained liver sections utilized for the histological assessment of differences between CC011 and CC074 at 3 dpi and 6 dpi; scale bars indicate 50µm. Immunostaining for fibrinogen was most often associated with leukocytes (inflammation) and sinusoidal endothelium.

Immunostaining for cleaved caspase 3 (apoptosis) was most often associated with hepatocytes and leukocytes in nearly equal numbers except for the CC074 6 dpi mice where leukocyte immunostaining predominated. Also, cleaved caspase 3 immunostaining of the vascular endothelium occurred less frequently in the CC011 as compared to CC074 livers.

Immunostaining for CD31 (endothelial marker) at 6 dpi was excessive in sinusoids for both CC strains.

### Figure S2. Weight loss and viral load of CC011xCC074-F2 mice. Eight- to 10-week-old

CC011xCC074-F2 mice (n=236; 123 females, 113 males) were infected with 100 ffu MA-EBOV i.p. Weight loss for **A.** male and **B.** female CC011xCC074-F2 mice over the time of infection,

bold lines indicate mean weights of CC011 (black) and CC074 (red) parental strains, respectively.

**C.** Viral load in the liver for CC011xCC074-F2 on 6 dpi. **D.** Correlation analysis of viral load in liver (ffu equivalent/mg tissue) and weight loss for CC011xCC074-F2 on 6 dpi.

### Figure S3. Identification of a QTL on Chr8 for viral load in the blood and the liver. The 8-

to 10-week-old CC011xCC074-F2 mice (n=236; 123 females, 113 males) were generated and

infected with 100 ffu MA-EBOV i.p. and followed for 6 days for weight loss and mortality. **A.** Viral

load in the blood at 6 dpi (ffu equivalents/ml). **B.** QTL map for the viral load in the blood on 6

dpi. **C.** Correlation analysis of viral load in blood and weight loss for CC011xCC074-F2 on 6 dpi. **D.** Viral load in the liver at 6 dpi (ffu equivalents/mg). **E.** QTL map for viral load in the liver on 6 dpi. LOD = log<sub>10</sub> likelihood ratio; dotted line indicates the genome-wide p=0.05 significance threshold.

**Figure S4. Different EVD-like disease of *Trim*<sup>-/-</sup> and *Trim*<sup>+/+</sup> after MA-EBOV infection. A.**

Left panel: The zinc finger residues of the WT TRIM5 B-box 2 are highlighted in magenta. The histidine residue of interest is shown in stick representation. Middle panel: The zinc finger residues of the mutated B-box 2 are highlighted in orange. Mutation of the penultimate histidine to glutamine rotates the amino acid out of proximity to the zinc-binding domain. Right panel: Merged image of WT and mutant zinc fingers. To model the structural effects of the zinc finger mutation in TRIM5, homology modeling was performed using the published TRIM5 B-box 2 sequence (PDB: 2YRG). The structure of the sequence was modeled using the Phyre2 Protein Fold Recognition Server (<http://sbj.bio.ic.ac.uk>). The model chosen for alignment had 99.2% confidence and 79% identity. The downloaded model was then overlaid on the published structure in PyMOL (The PyMOL Molecular Graphics System, Version 2.0 Schrödinger, LLC.), and the mutant residue in the zinc finger was highlighted. **B.** Design for engineering of the *Trim*<sup>-/-</sup> mice. **C.** *Trim*<sup>-/-</sup> animals were detected by PCR, a ~593 bp band for the *Trim*<sup>-/-</sup> allele and a 466 bp band for the *Trim* wild-type allele (*Trim*<sup>+/+</sup>), double-band indicates heterozygosity. **D.** Expression of *Trim* genes from *Trim5* locus as validated by whole genome RNA-seq. **E.** Weight loss for *Trim*<sup>-/-</sup> and *Trim*<sup>+/+</sup> mice used for immunohistological evaluation and gene expression profiling. **F.** Distribution of gross pathology phenotypes for *Trim*<sup>-/-</sup> mice and *Trim*<sup>+/+</sup> mice (from E.). **G.** Representative images (20x and 40x, respectively) of the fibrinogen, cleaved caspase 3 (apoptosis), and CD31 (endothelial marker) immunostained liver sections utilized for the histological assessment of differences between *Trim*<sup>-/-</sup> mice and *Trim*<sup>+/+</sup> mice at 3 dpi and 6 dpi; scale bars indicate 50µm Immunostaining for fibrinogen was most often associated with

leukocytes (inflammation) and sinusoidal endothelium. Immunostaining for cleaved caspase 3 (apoptosis) was most often associated with hepatocytes and leukocytes at 3 dpi and included some vascular endothelium staining at 6 dpi. Immunostaining for CD31 (endothelial marker) at 6 dpi was excessive in sinusoids for *Trim*<sup>-/-</sup> mice and *Trim*<sup>+/+</sup> mice. Data were analyzed using Mann-Whitney test (weight loss).

**Figure S5. Differentially-expressed gene signatures indicate upregulated inflammatory and cytokine responses and a downregulation of metabolic processes in the liver of CC011xCC074-F2 mice with severe EVD-like disease.** The 8-10-week-old CC011xCC074-F2 mice (n=236; 123 females, 113 males) were generated and infected with 100 ffu MA-EBOV i.p. and followed for 6 days for weight loss and mortality. CC011xCC074-F2 mice were stratified based on their weight loss and the top 15 mice at the extreme ends of bodyweight loss and total RNA from liver tissues subjected to RNA-seq. **A.** Percent starting body weight of high weight loss (HWL), the low weight loss (LWL), and the uninfected (UI, n=9) groups. **B.** Viral load in the liver for CC011xCC074-F2 mice on 6 dpi. **C.** Distribution of gross pathology phenotypes for CC011xCC074-F2 mice from the high weight loss group (HWL), and the low weight loss group (LWL). Gross pathology scores on a scale from 0 (no change) to 4 (100% changed). **D.** Heatmap of the top 5 ranked genes in the top 10 significantly enriched pathways of infected groups (HWL and LWL) compared to the UI group (< 1.5 Log<sub>2</sub> fold over mock; p < 0.05); shown are the average expression levels for each gene for each group, UI=9 mice, LWL=15 mice, and HLW=15 mice, respectively. Data were analyzed using Mann-Whitney test (liver titer).

**Table S1. Scoring of histopathological findings in CC011, CC074, *Trim*<sup>-/-</sup>, and *Trim*<sup>+/+</sup> mice.**

**Table S2. SNPs in CC011 and CC074 within the *QES1* and *QES2* loci.**

**Table S3. Genes that are differentially expressed on 3dpi and 6dpi in CC011, CC074, *Trim*<sup>-/-</sup>, *Trim*<sup>+/+</sup>, and CC011xCC074-F2 mice (6dpi only) (<1.5 Log<sub>2</sub> over mock, p < 0.05).**

**Table S4. Gene of the top five ranked genes in the top 20 significantly enriched pathways of infected groups CC011 and CC074 (3dpi and 6dpi) compared to their respective uninfected control group.**

**Table S5. Gene of the top five ranked genes in the top 20 significantly enriched pathways of infected groups (HWL and LWL) compared to the UI group.**

**Table S6. Gene of the top five ranked genes in the top 20 significantly enriched pathways of infected groups *Trim*<sup>-/-</sup> and *Trim*<sup>+/+</sup> (6dpi) compared to their respective uninfected control group.**

**TableS7. Key genes with significant expression changes during the development of liver disease during EBOV infection.**

Figure S1

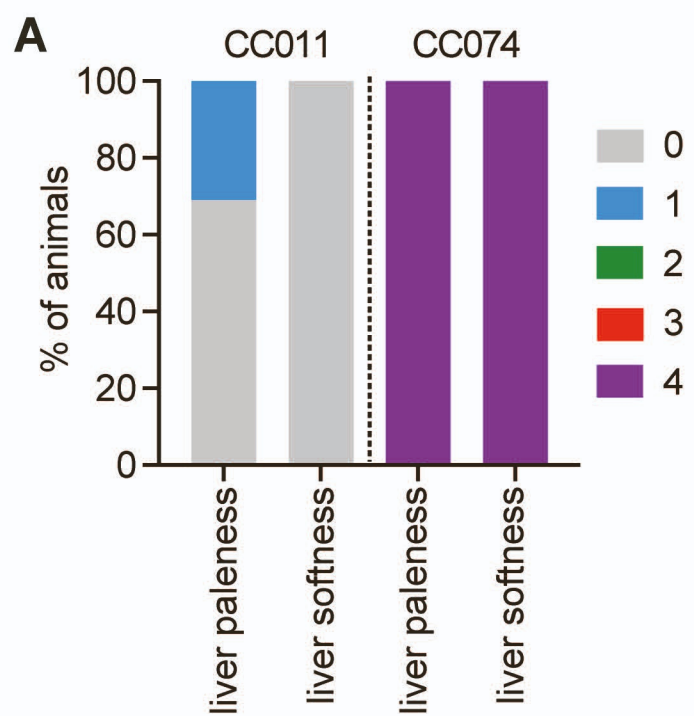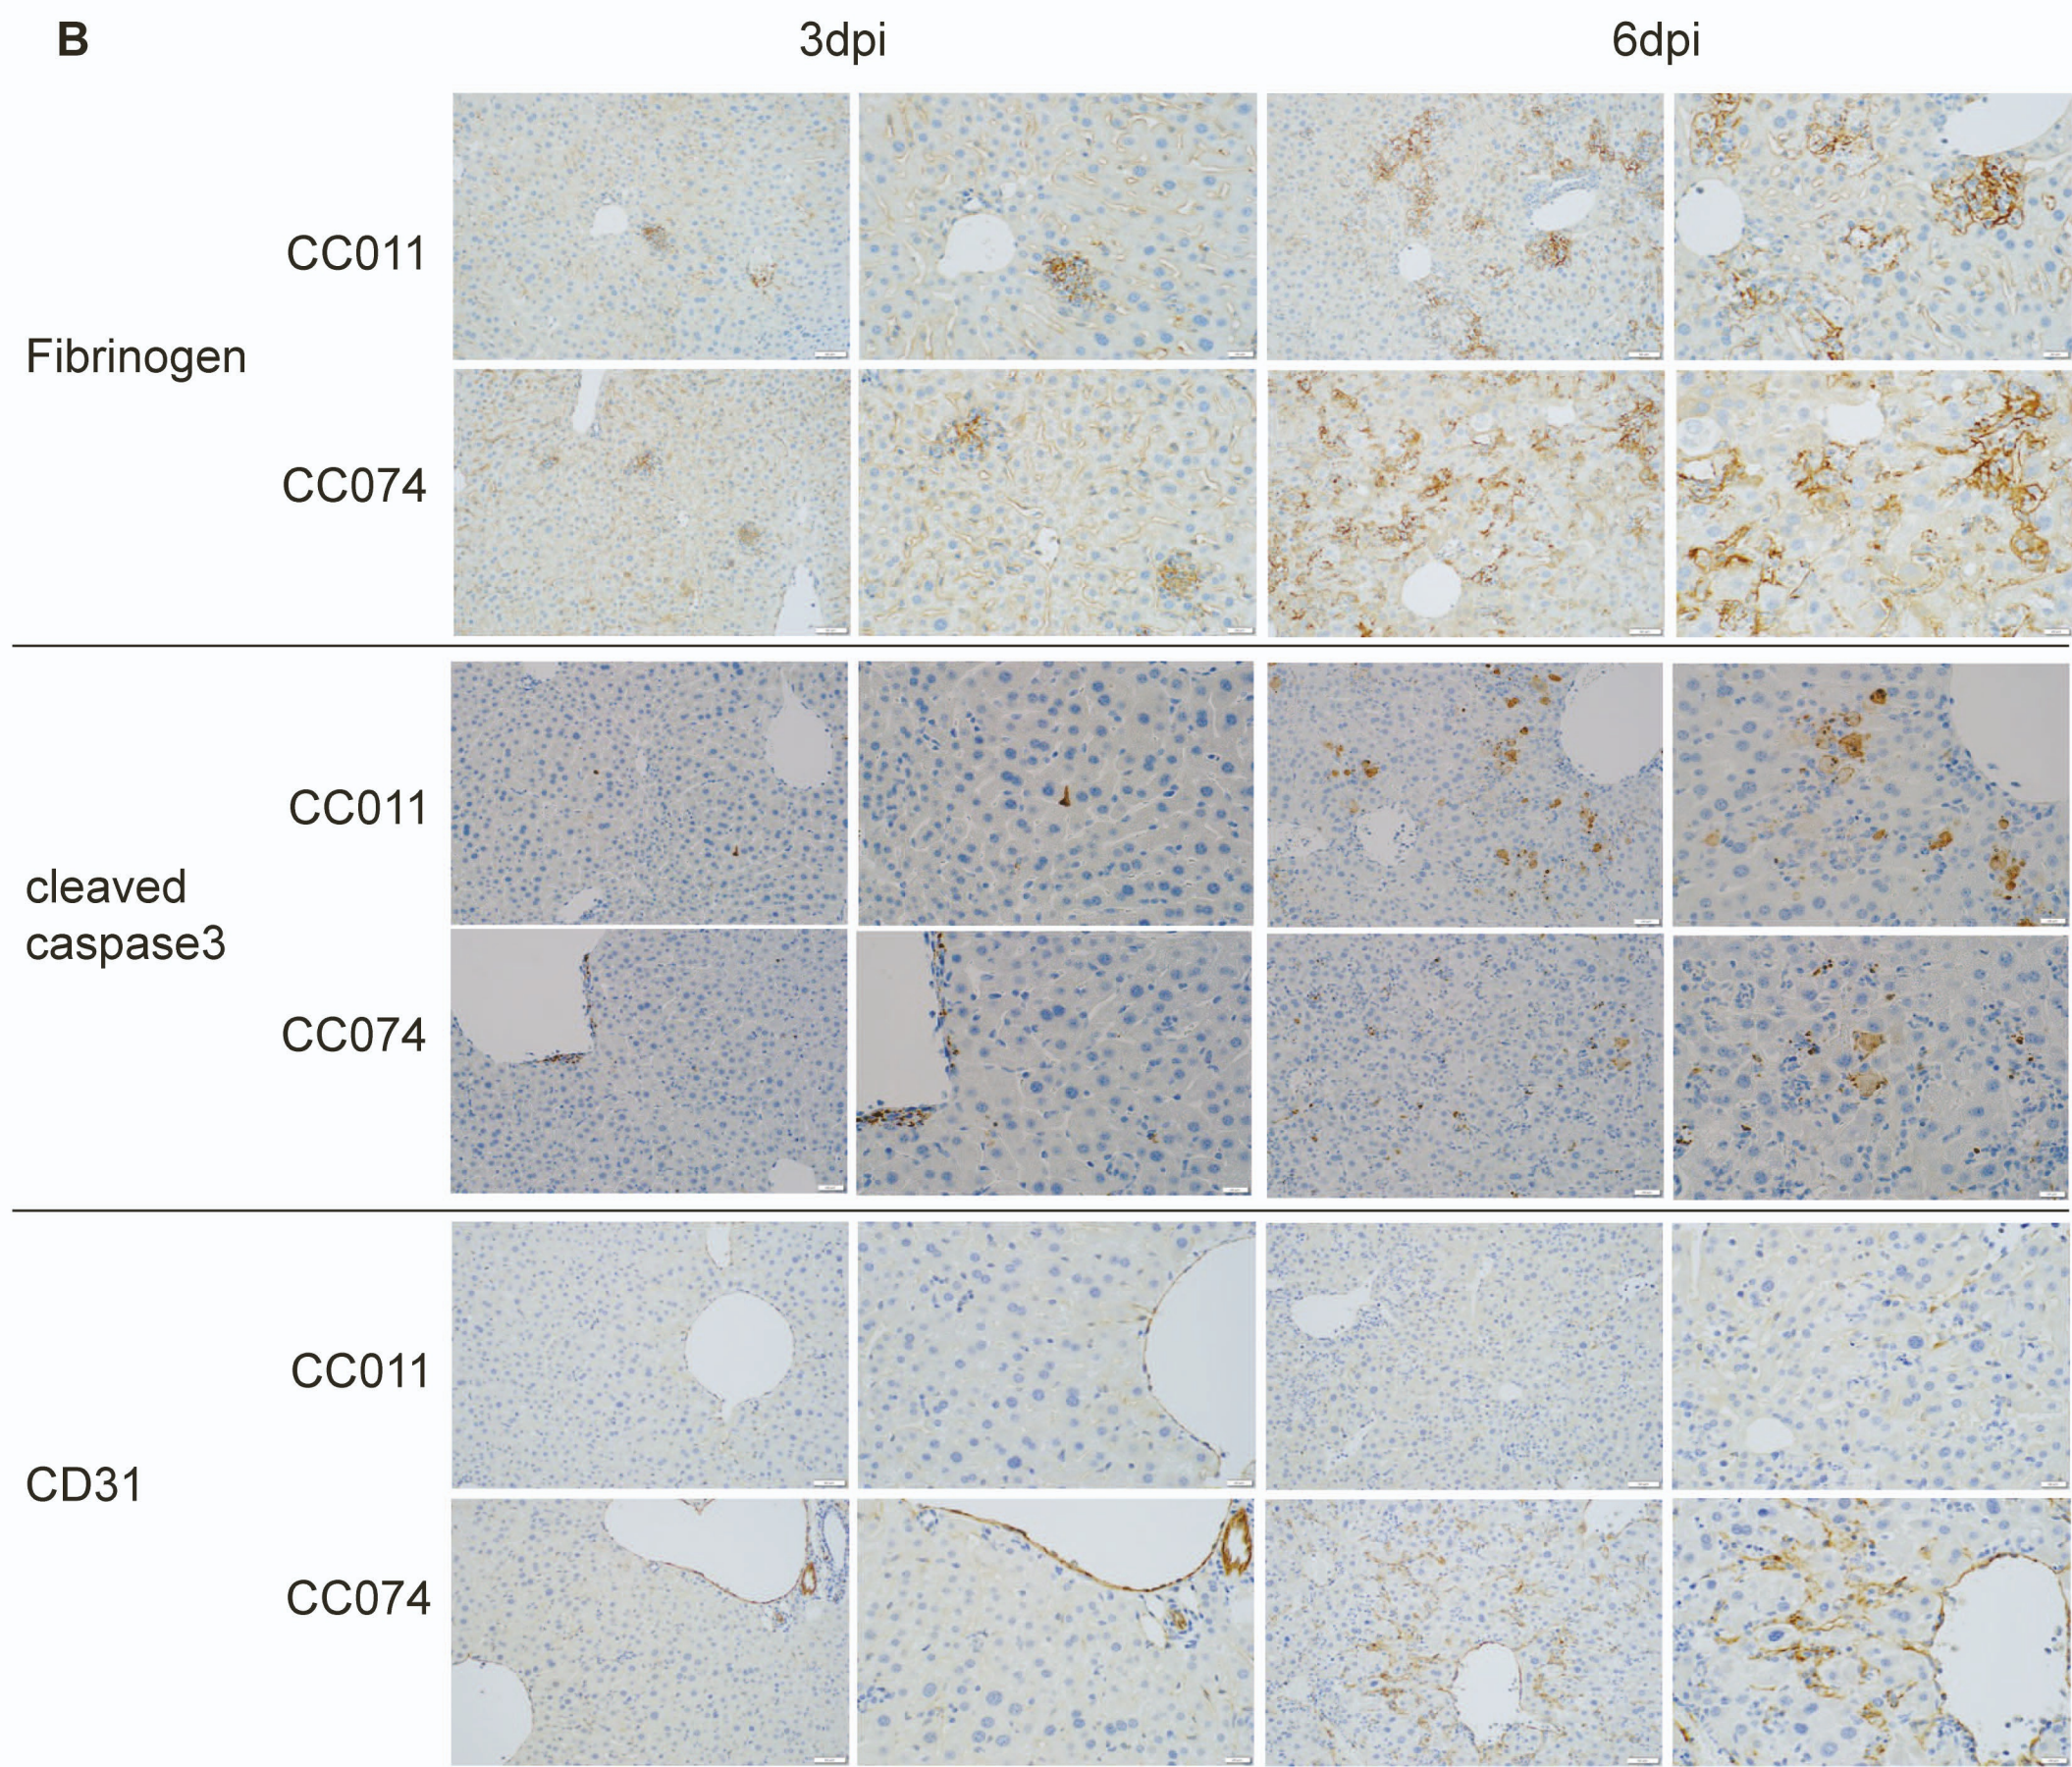

**Figure S2**

**A**

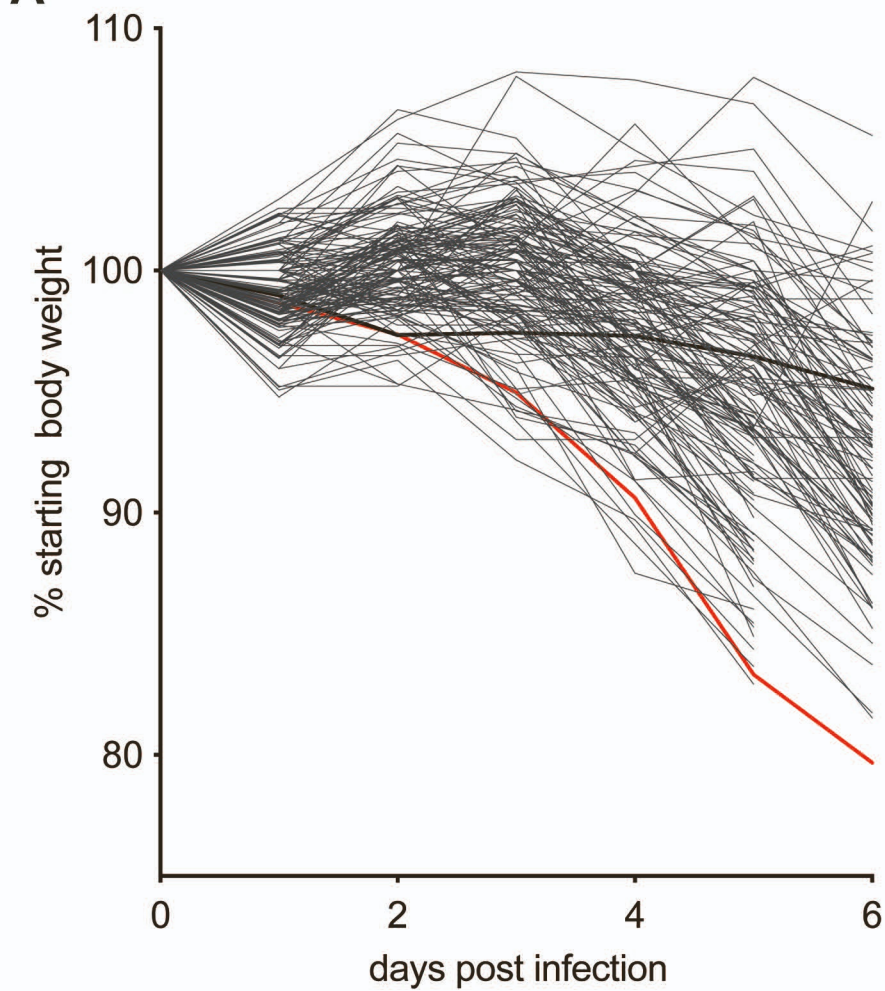

**B**

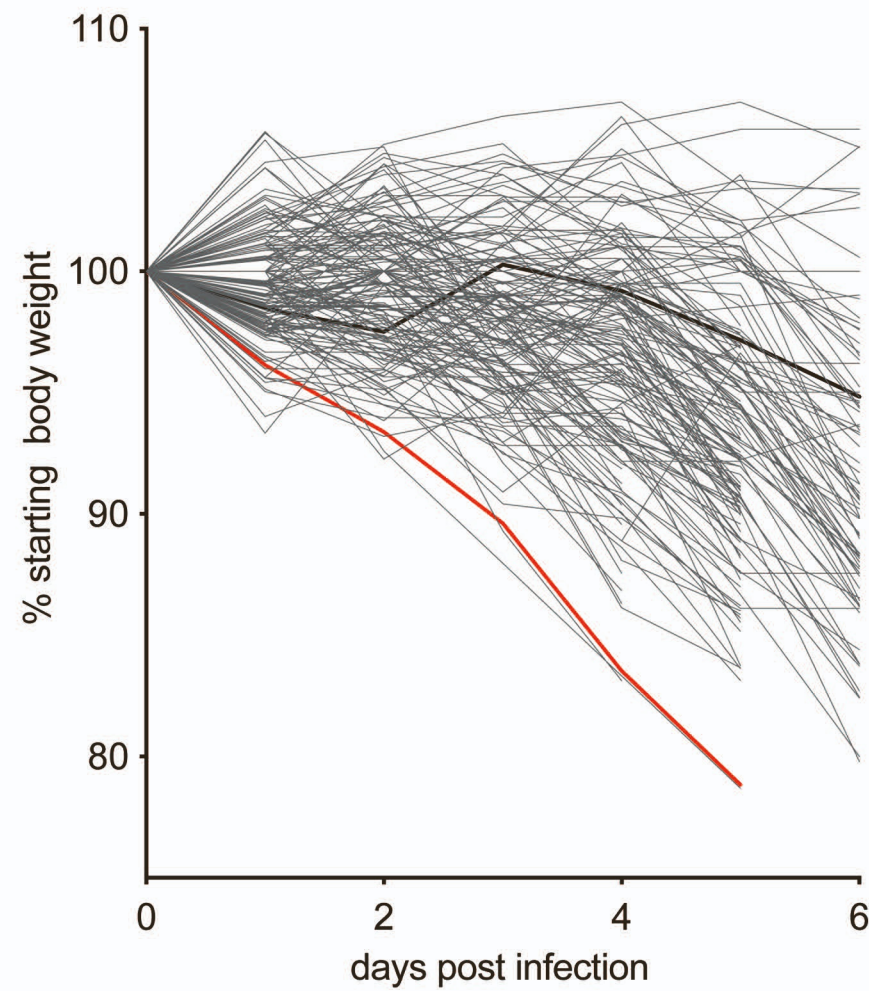

**C**

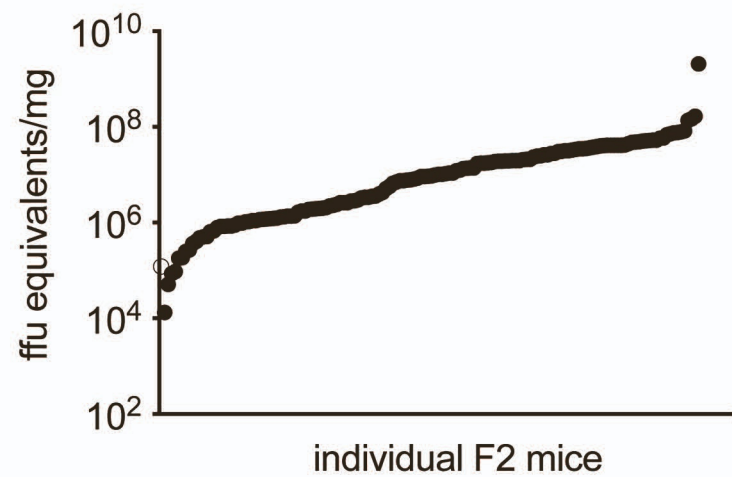

**D**

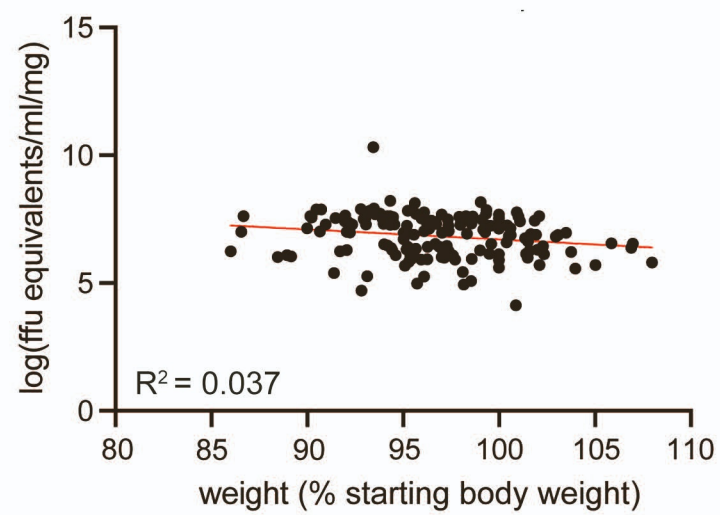

**Figure S3**

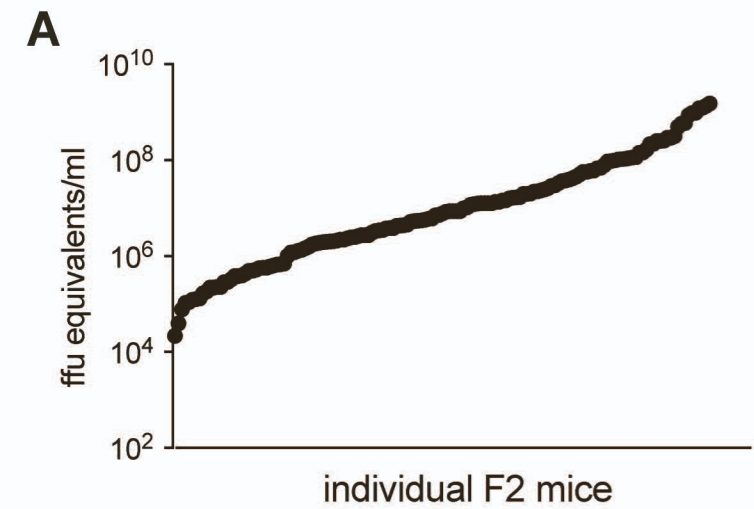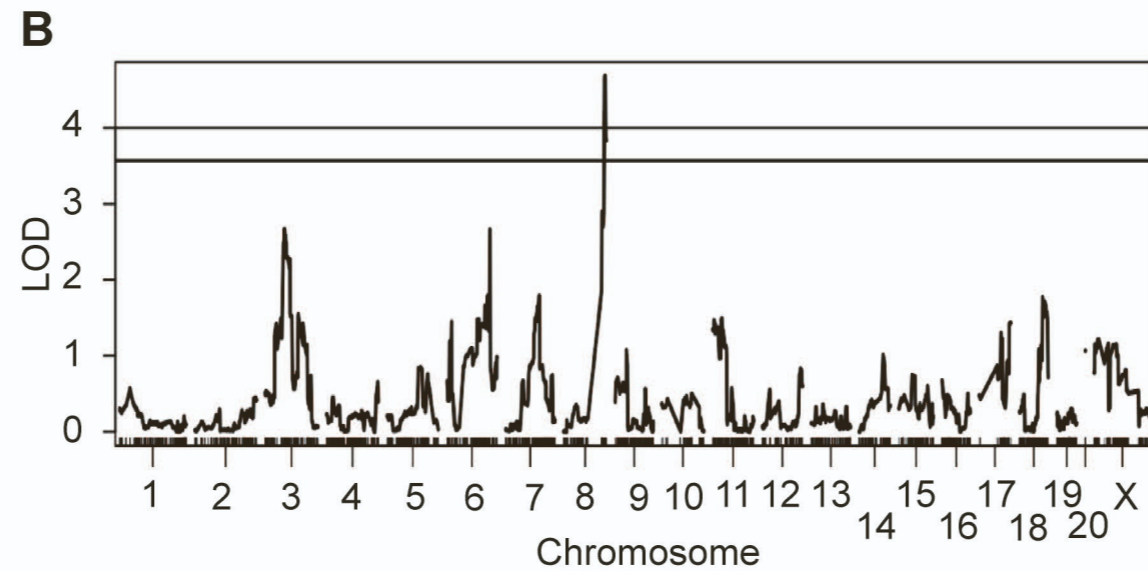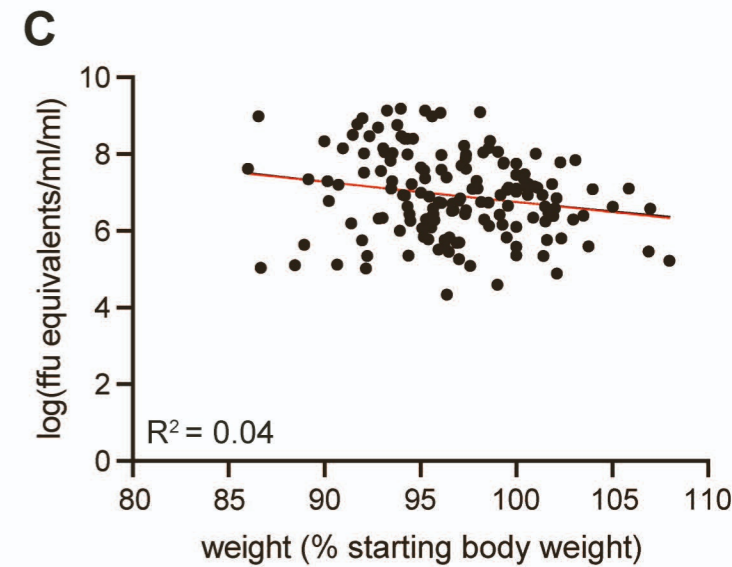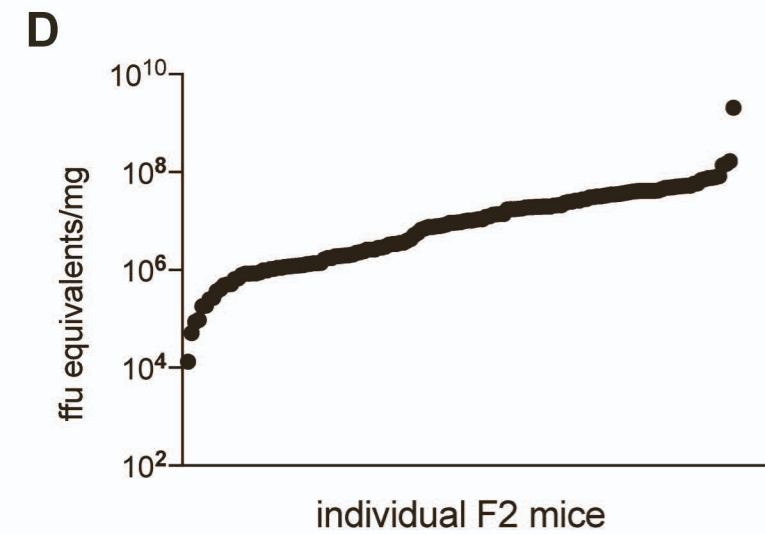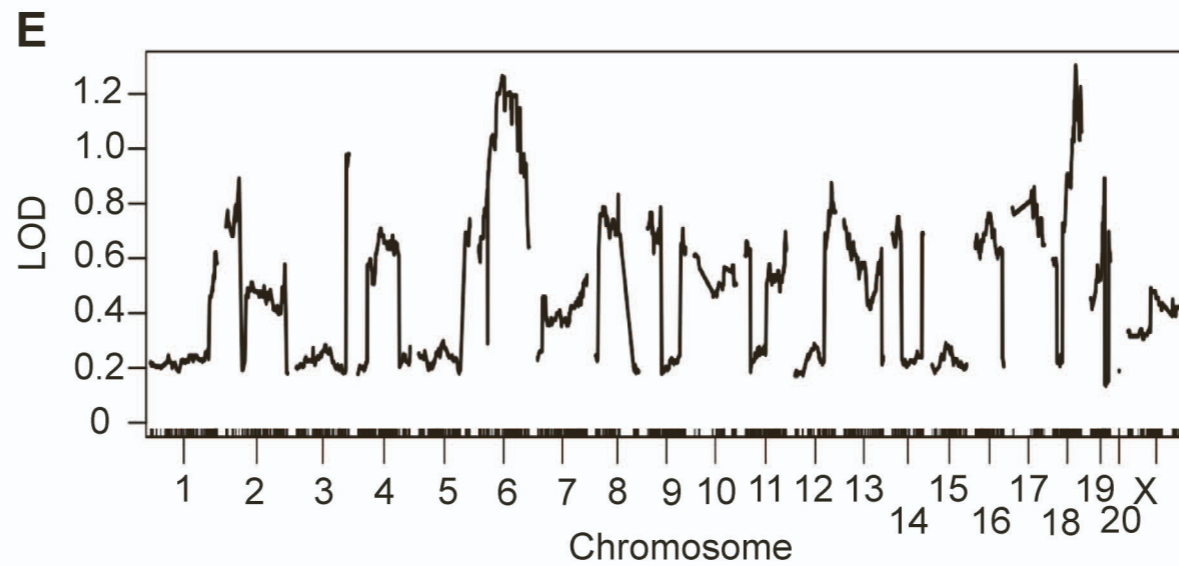



Figure S4

A

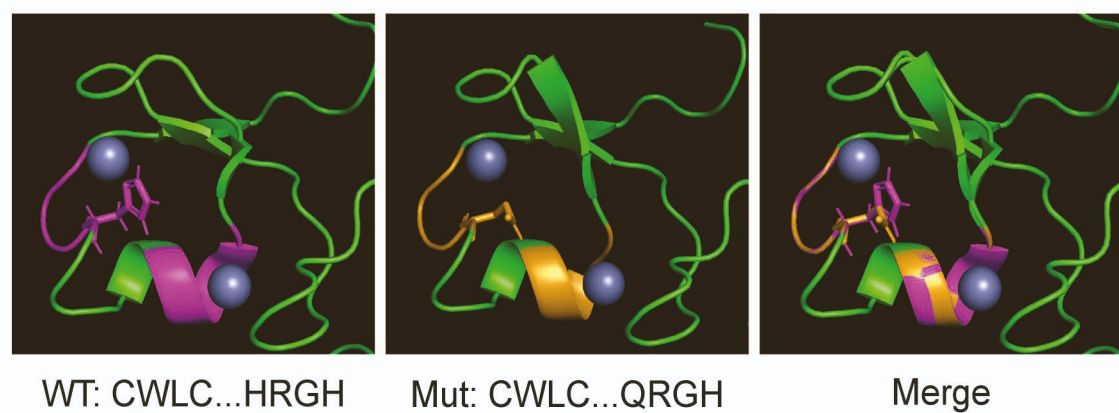

B

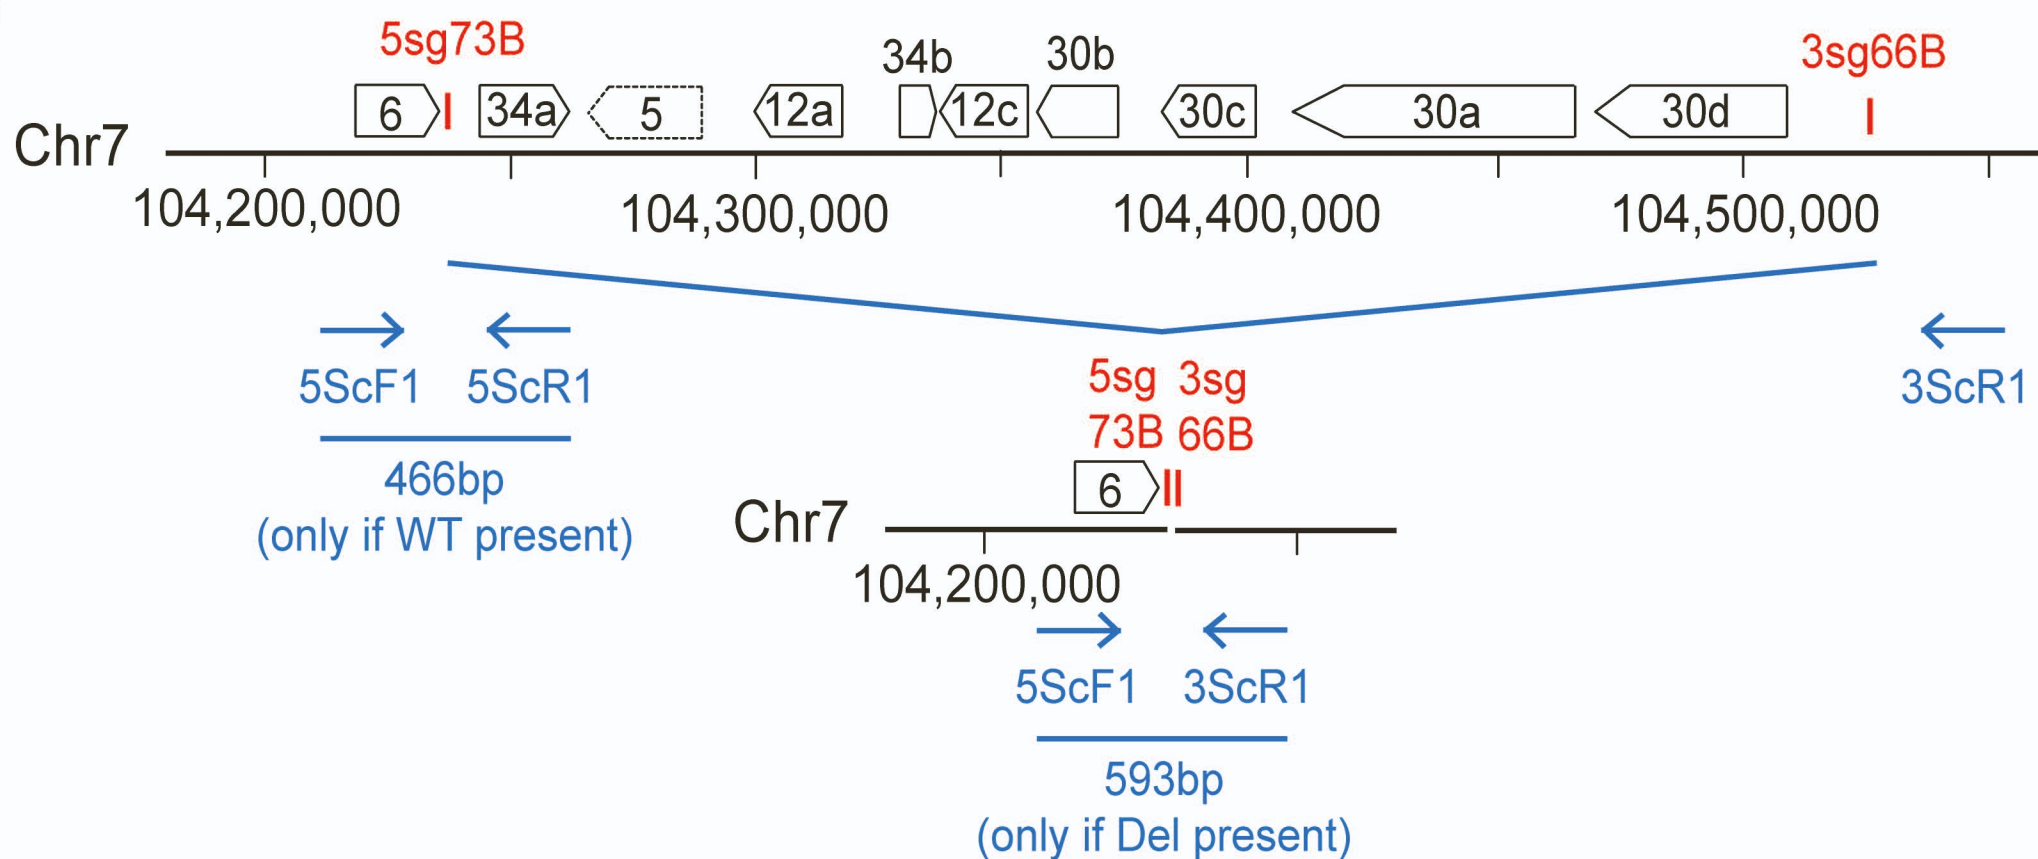

C

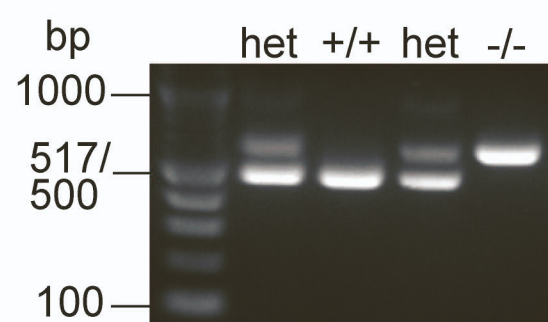

D

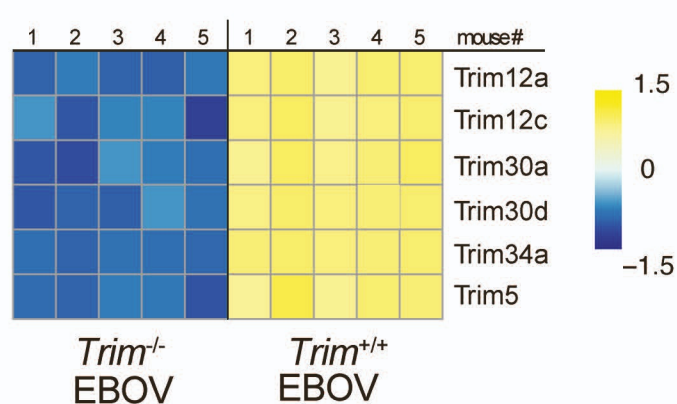

E

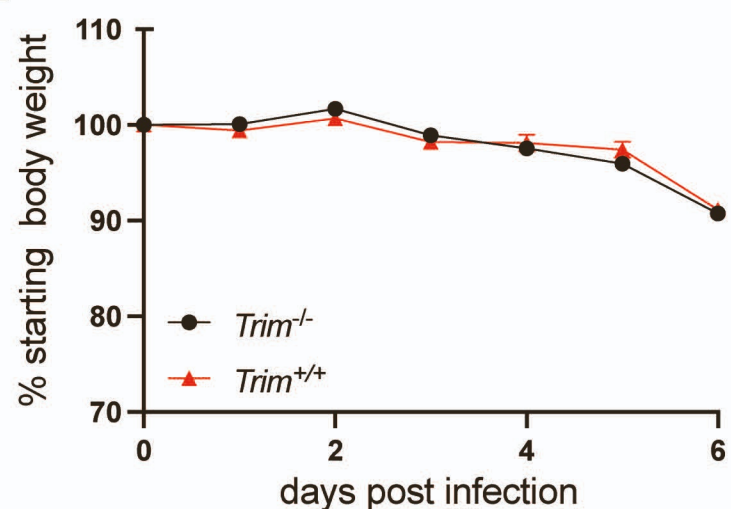

F

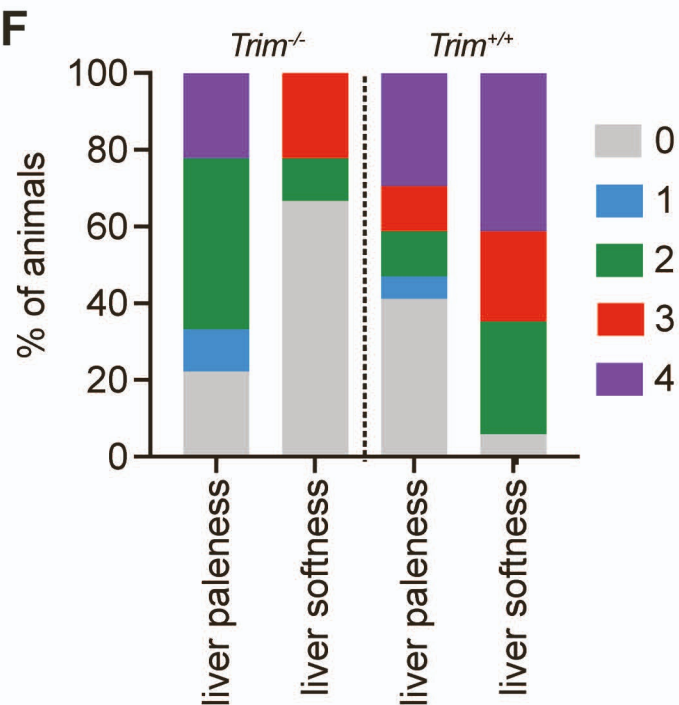

G

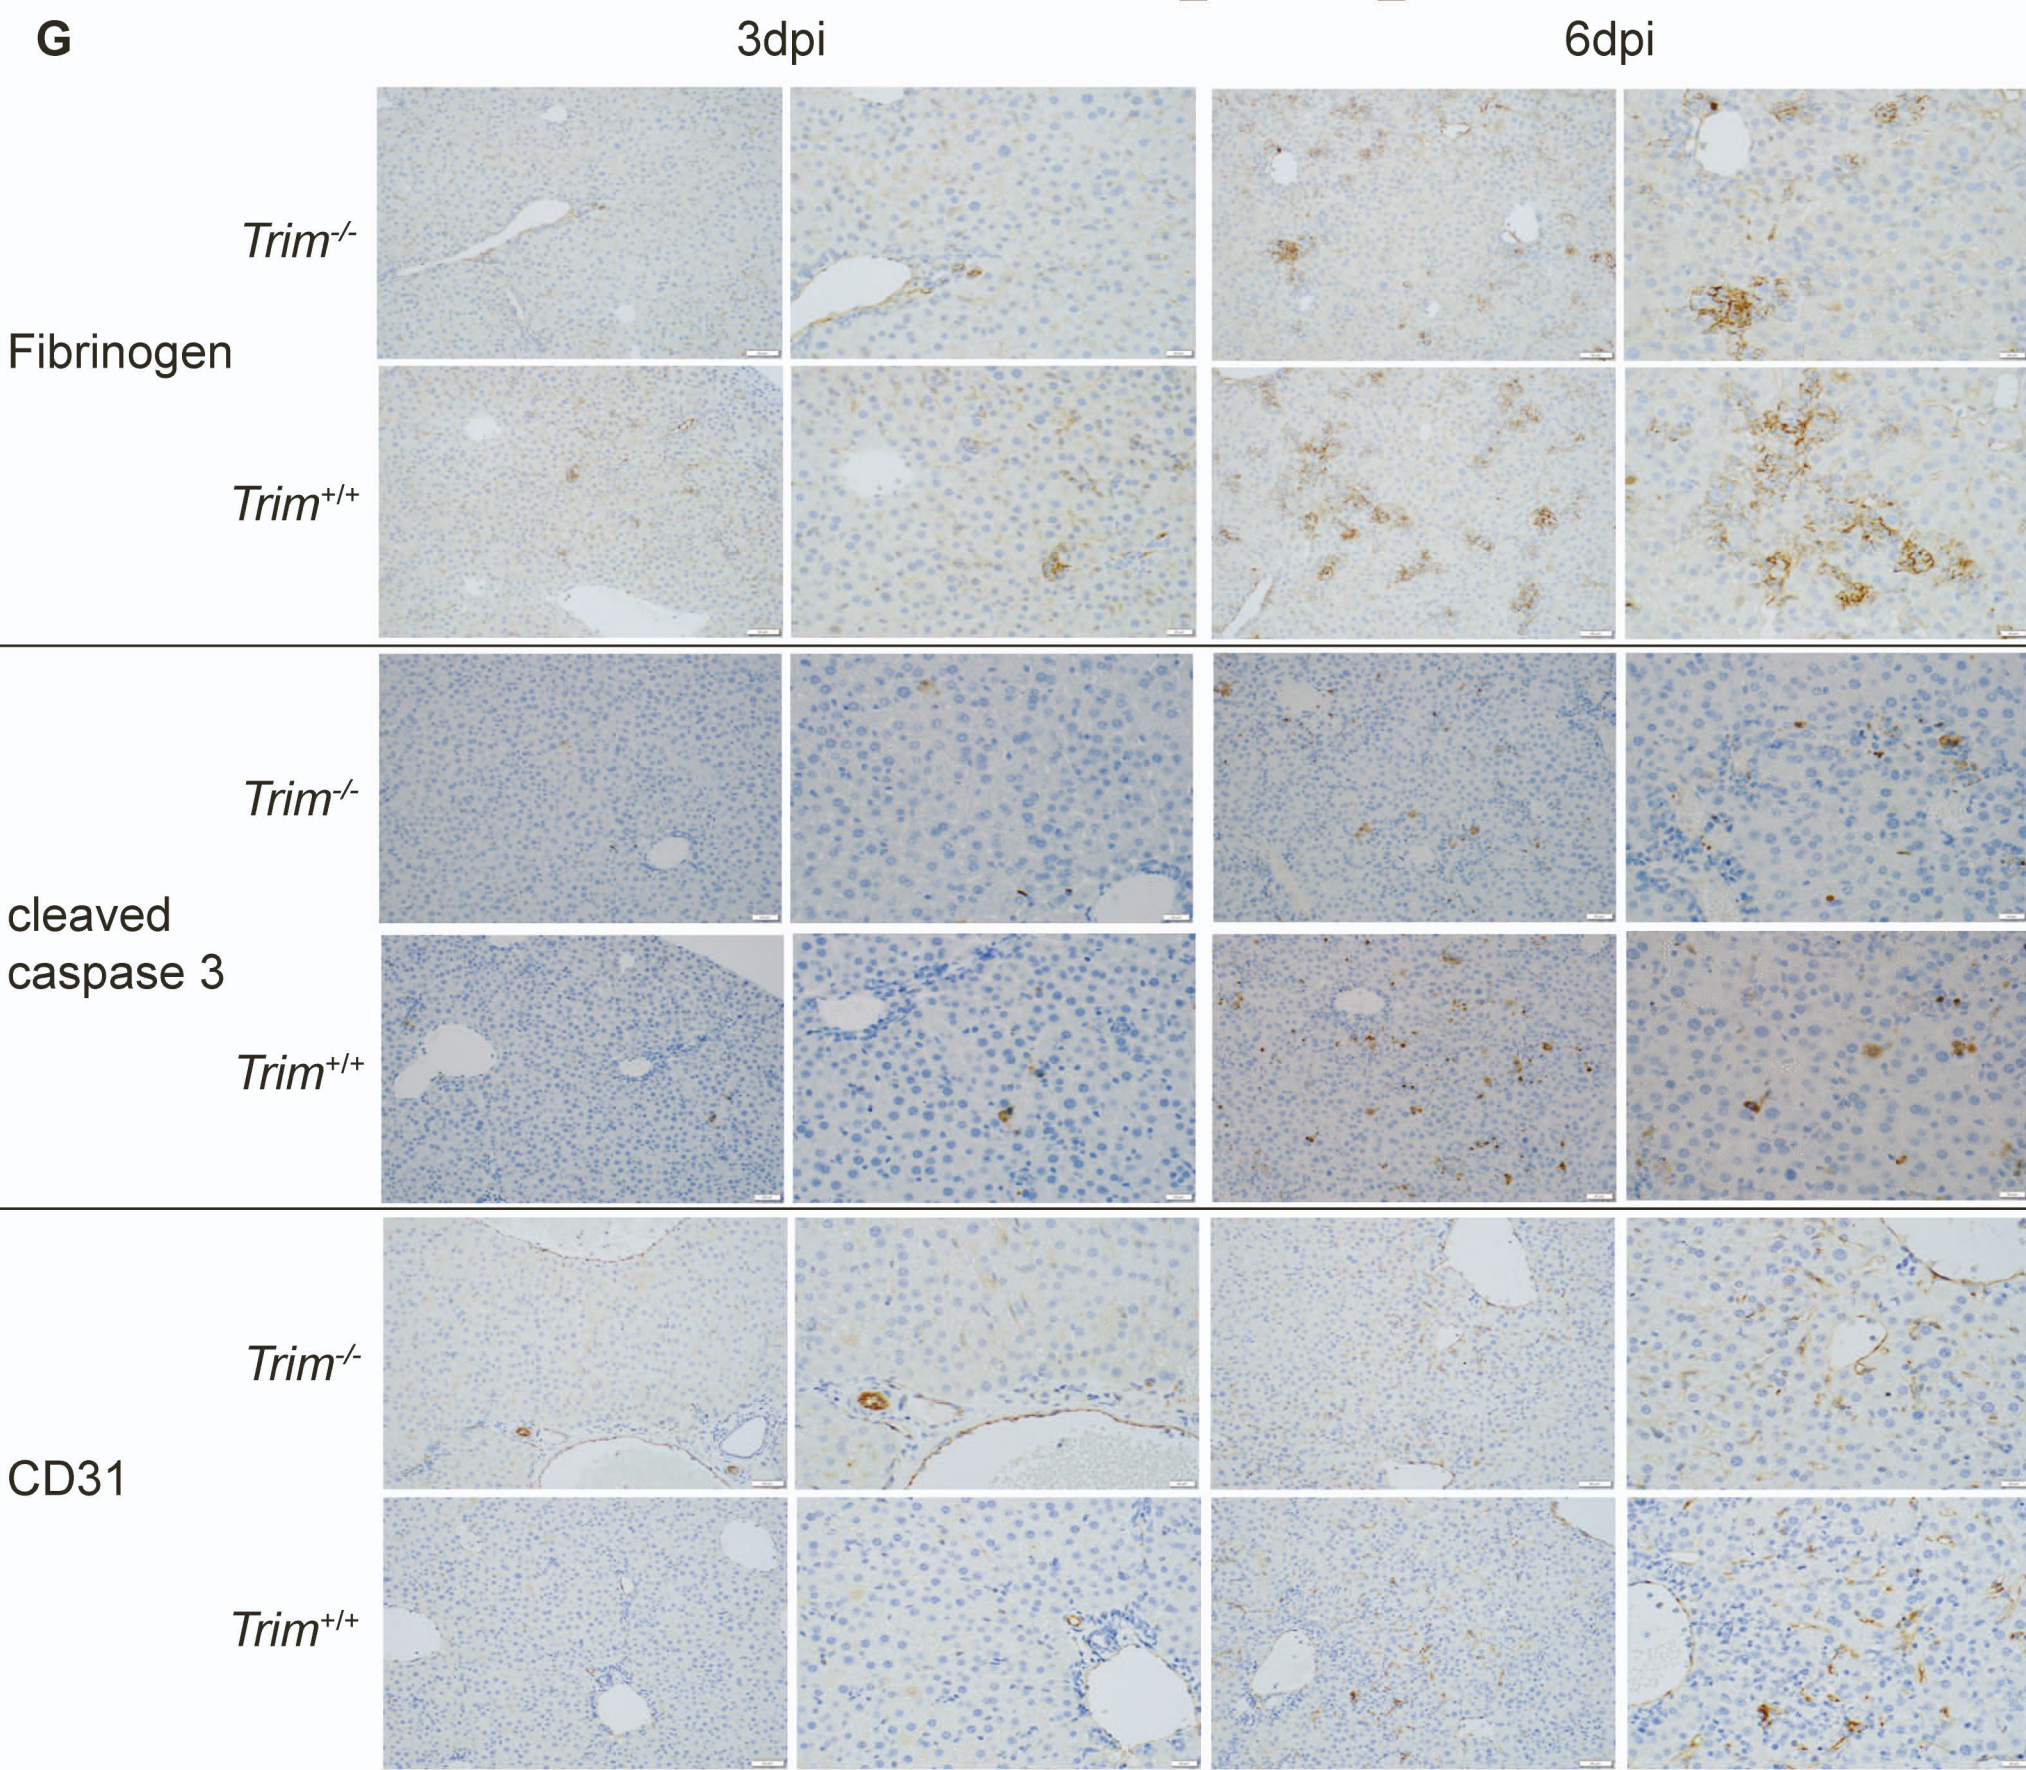

**Figure S5**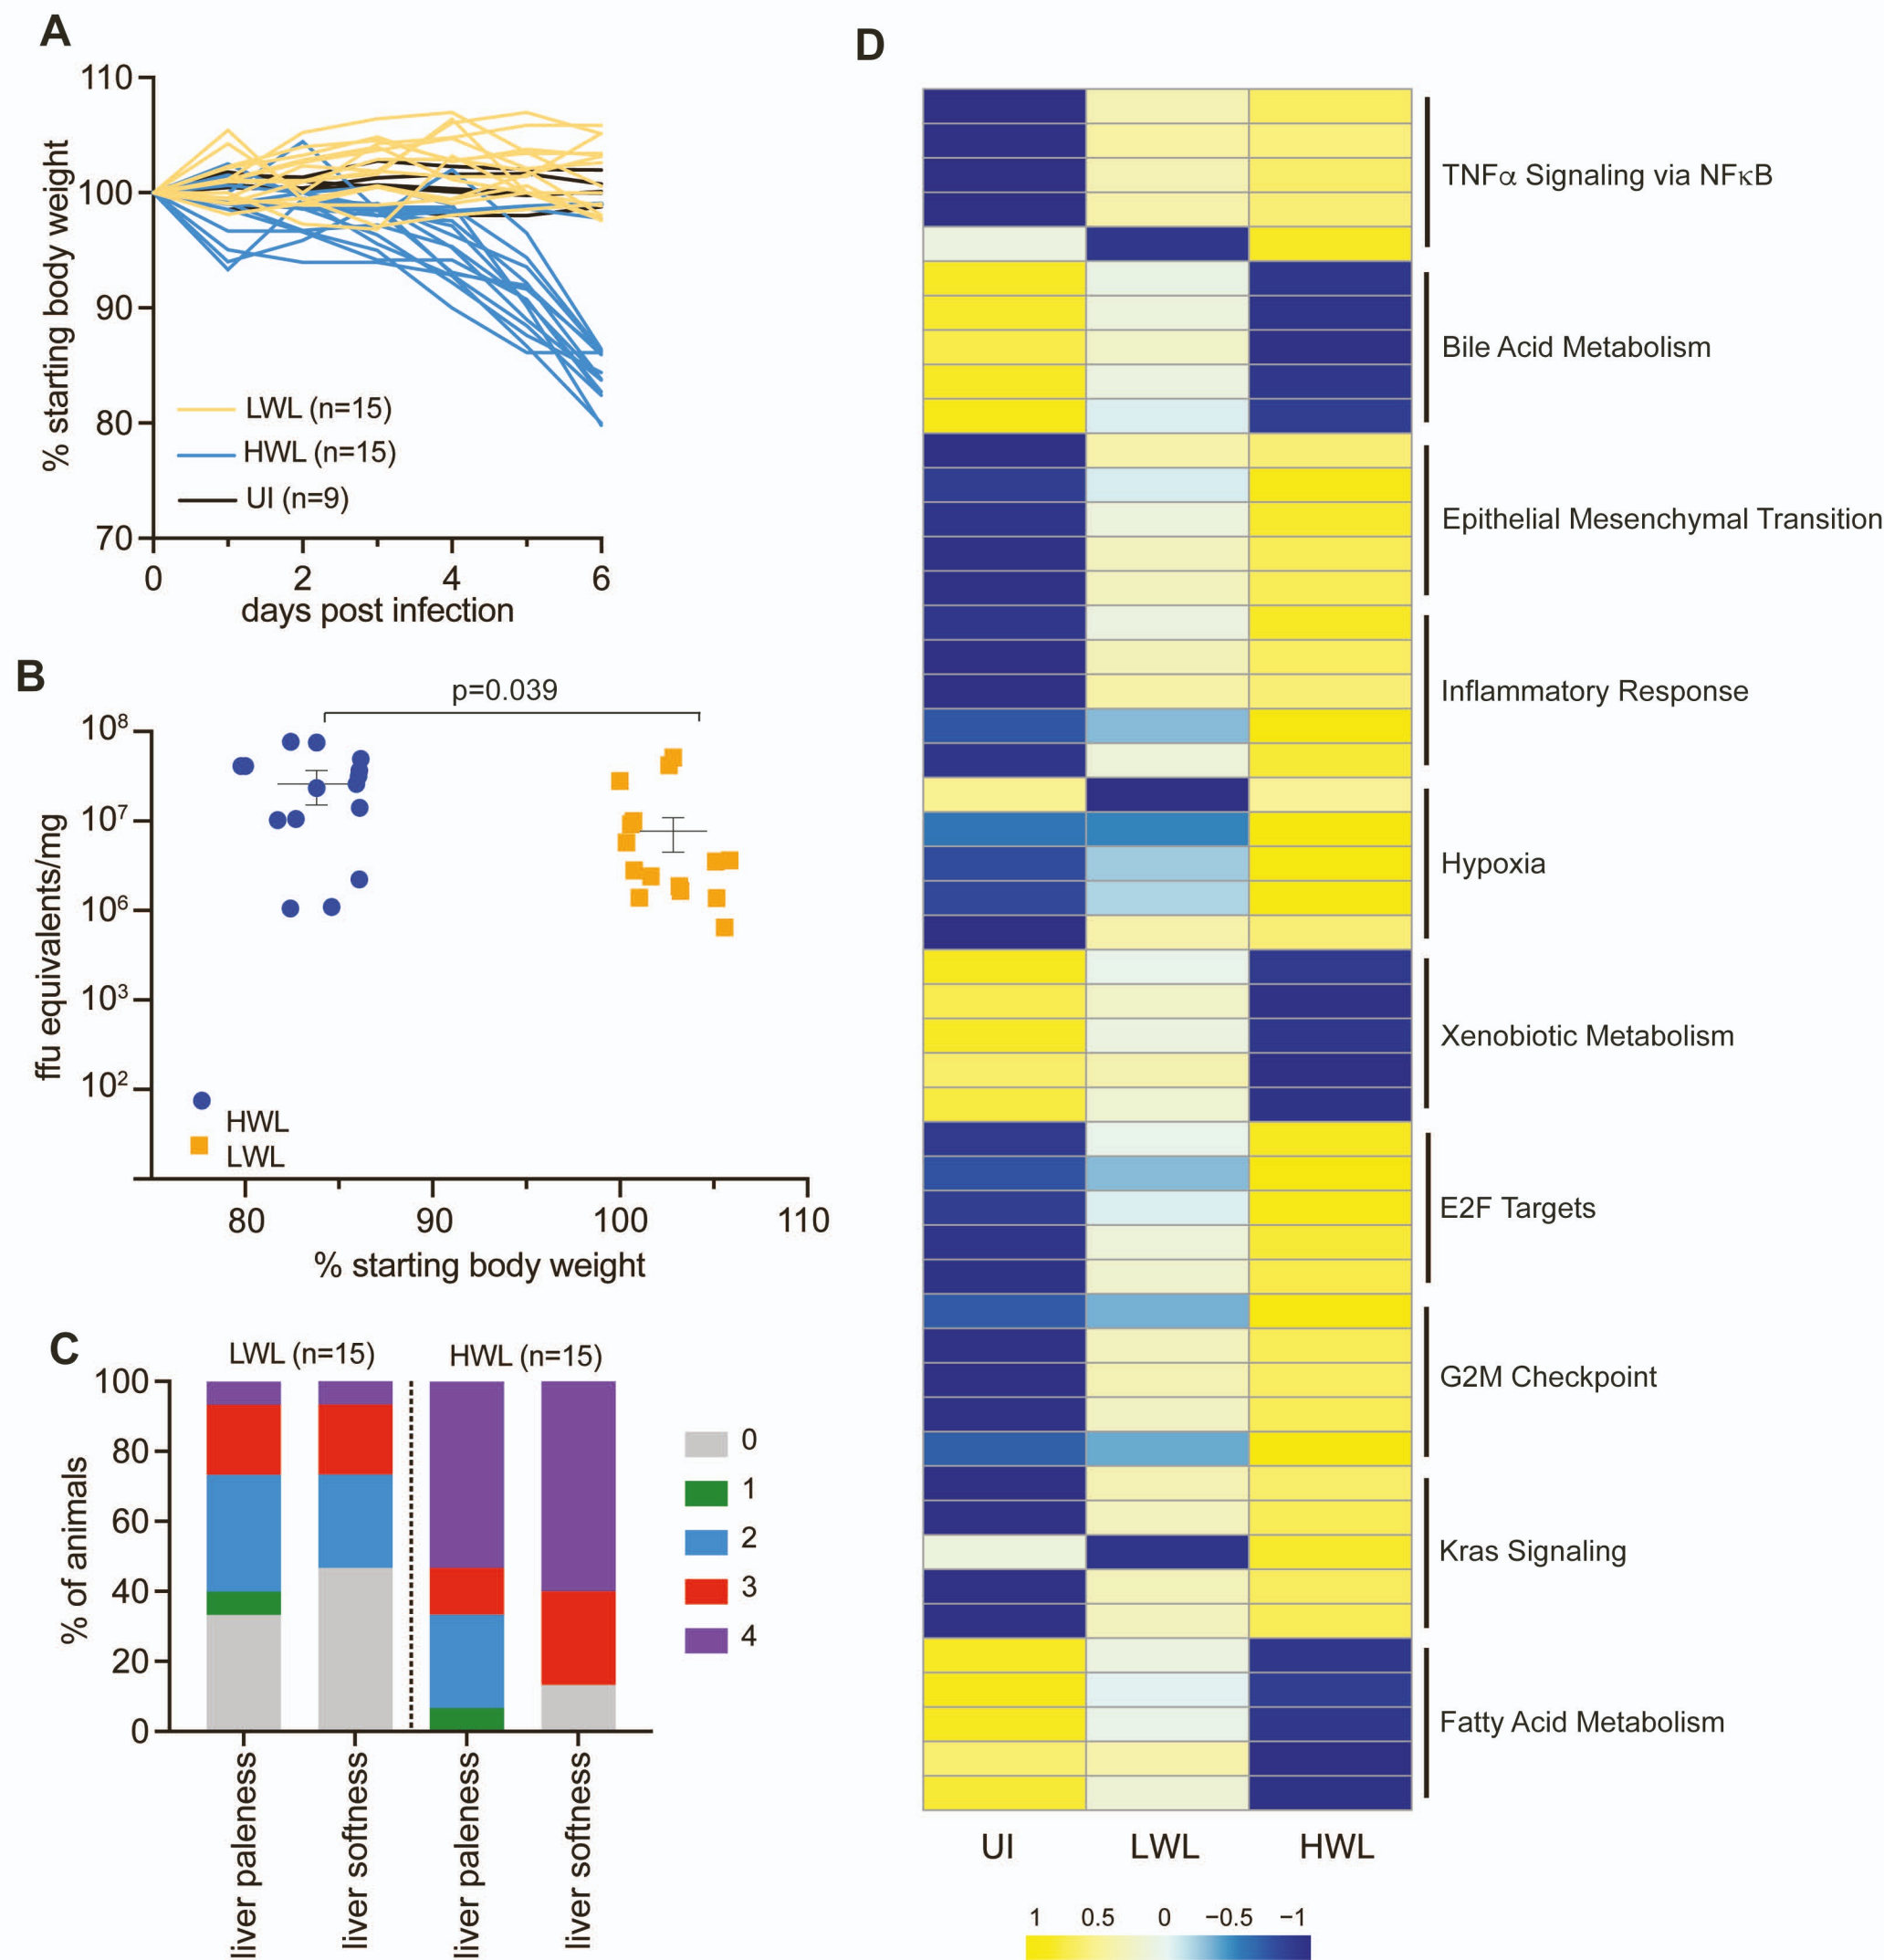

Table S3

| <b>Comparison</b>                                    | <b>Up</b> | <b>down</b> |           |
|------------------------------------------------------|-----------|-------------|-----------|
| CC011 mock vs CC011 3dpi                             | 966       | 2114        | Figure 5  |
| CC011 mock vs CC011 6dpi                             | 1205      | 2243        |           |
| CC074 mock vs CC074 3dpi                             | 1860      | 3051        |           |
| CC074 mock vs CC074 6dpi                             | 436       | 435         |           |
| CC011 3dpi vs CC74 3dpi                              | 435       | 594         |           |
| CC011 6dpi vs CC074 6dpi                             | 477       | 180         |           |
|                                                      |           |             |           |
| Trim <sup>-/-</sup> mock vs Trim <sup>-/-</sup> 3dpi | 363       | 611         | Figure 6  |
| Trim <sup>-/-</sup> mock vs Trim <sup>-/-</sup> 6dpi | 962       | 1325        |           |
| Trim <sup>+/+</sup> mock vs Trim <sup>+/+</sup> 3dpi | 215       | 570         |           |
| Trim <sup>+/+</sup> mock vs Trim <sup>+/+</sup> 6dpi | 1481      | 1638        |           |
| Trim <sup>+/+</sup> 3dpi vs Trim <sup>-/-</sup> 3dpi | 8         | 2           |           |
| Trim <sup>+/+</sup> 6dpi vs Trim <sup>-/-</sup> 6dpi | 134       | 56          |           |
|                                                      |           |             |           |
| LWL 6dpi vs HWL 6dpi                                 | 210       | 451         | Figure S5 |

Table S7

| Gene           | 3dpi              |                   |               | 6dpi              |                   |               |
|----------------|-------------------|-------------------|---------------|-------------------|-------------------|---------------|
|                | Trim+/+           | Trim-/-           | p             | Trim+/+           | Trim-/-           | p             |
| <i>Vegfa</i>   | 8.41 +/-<br>0.38  | 9.32 +/-<br>0.85  | 0.0556        | 6.6 +/- 0.19      | 7.05 +/-<br>0.29  | <b>0.0317</b> |
| <i>Itgb8</i>   | 0.58 +/-<br>0.42  | 1.14 +/-<br>0.32  | 0.0952        | 2.13 +/-<br>0.29  | 2.46 +/-<br>0.04  | <b>0.0317</b> |
| <i>Mmp2</i>    | 0.26 +/-<br>0.46  | 1.13 +/-<br>0.41  | <b>0.0317</b> | 1.59 +/-<br>0.43  | 2.44 +/-<br>0.27  | <b>0.0079</b> |
| <i>F7</i>      | 7.12 +/-<br>0.11  | 6.77 +/-<br>0.11  | <b>0.0079</b> | 5.61 +/-<br>0.14  | 5.87 +/-<br>0.16  | <b>0.0317</b> |
| <i>Cdh</i>     | 5.83 +/-<br>0.27  | 4.99 +/-<br>0.41  | <b>0.0079</b> | 5.14 +/-<br>0.26  | 6.02 +/-<br>0.47  | <b>0.0079</b> |
| <i>Cyp39a1</i> | 1.49 +/-<br>0.94  | 2.78 +/-<br>1.13  | <b>0.0317</b> | 2.44 +/-<br>0.41  | 1.72 +/-<br>0.55  | 0.0952        |
| <i>Agxt</i>    | 7.92 +/-<br>0.26  | 6.74 +/- 0.8      | <b>0.0079</b> | 5.49 +/-<br>0.48  | 6.28 +/-<br>0.62  | 0.0556        |
| <i>Alb</i>     | 15.03 +/-<br>0.6  | 14.31 +/-<br>1.04 | 0.2222        | 12.3 +/-<br>0.54  | 13.78 +/-<br>0.16 | <b>0.0079</b> |
| <i>Ang</i>     | 9.41 +/-<br>0.22  | 8.44 +/-<br>0.51  | <b>0.0317</b> | 7.4 +/- 0.36      | 8.3 +/- 0.19      | <b>0.0079</b> |
| <i>Apoa2</i>   | 11.02 +/-<br>0.5  | 10.53 +/-<br>0.73 | 0.2222        | 7.95 +/-<br>0.36  | 9.27 +/-<br>0.28  | <b>0.0079</b> |
| <i>Apoc1</i>   | 10.84 +/-<br>0.39 | 10.06 +/-<br>0.77 | 0.1508        | 8.96 +/-<br>0.34  | 10.11 +/-<br>0.2  | <b>0.0079</b> |
| <i>Apob</i>    | 13.66 +/-<br>0.16 | 13.0 +/-<br>0.46  | <b>0.0317</b> | 13.00 +/-<br>0.46 | 13.66 +/-<br>0.16 | <b>0.0079</b> |
| <i>Aldh7a1</i> | 7.73 +/-<br>0.28  | 7.35 +/-<br>0.46  | 0.0952        | 6.15 +/-<br>0.32  | 6.87 +/-<br>0.29  | <b>0.0079</b> |
| <i>Adipor</i>  | 8.16 +/-<br>0.31  | 7.98 +/-<br>0.78  | 0.5476        | 7.04 +/-<br>0.27  | 7.49 +/- 0.2      | <b>0.0317</b> |
| <i>C4bp</i>    | 9.14 +/-<br>0.23  | 8.29 +/-<br>0.56  | <b>0.0159</b> | 8.54 +/-<br>0.17  | 9.44 +/-<br>0.14  | <b>0.0079</b> |
| <i>C1qbp</i>   | 5.34 +/-<br>0.07  | 4.58 +/-<br>0.76  | 0.1508        | 4.2 +/- 0.3       | 5.15 +/-<br>0.14  | <b>0.0079</b> |
| <i>Cers4</i>   | 2.65 +/-<br>0.17  | 3.53 +/-<br>0.56  | <b>0.0317</b> | 2.86 +/-<br>0.25  | 2.64 +/-<br>0.46  | 0.4206        |
| <i>Ces2a</i>   | 6.55 +/-<br>0.43  | 6.26 +/-<br>0.66  | <b>0.4206</b> | 3.52 +/-<br>0.34  | 4.72 +/- 0.5      | <b>0.0079</b> |
| <i>Crp</i>     | 9.3 +/-<br>0.41   | 8.12 +/-<br>0.67  | <b>0.0317</b> | 8.4 +/- 0.48      | 7.44 +/-<br>0.31  | <b>0.0159</b> |
| <i>Dhfr</i>    | 4.16 +/-<br>0.44  | 3.53 +/-<br>0.84  | 0.2222        | 3.03 +/-<br>0.16  | 3.65 +/-<br>0.28  | <b>0.0079</b> |
| <i>F13b</i>    | 6.84 +/-<br>0.62  | 6.06 +/-<br>0.83  | 0.1508        | 4.62 +/- 0.4      | 5.94 +/-<br>0.42  | <b>0.0079</b> |
| <i>Fgb</i>     | 11.53 +/-<br>0.77 | 12.33 +/-<br>0.25 | 0.0952        | 11.51 +/-<br>0.48 | 12.66 +/-<br>0.12 | <b>0.0079</b> |

|                  |                   |                   |               |                   |                   |               |
|------------------|-------------------|-------------------|---------------|-------------------|-------------------|---------------|
| <i>Fgg</i>       | 11.87 +/-<br>0.26 | 11.18 +/-<br>0.74 | 0.2222        | 10.96 +/-<br>0.52 | 12.17 +/-<br>0.16 | <b>0.0079</b> |
| <i>Serpina1a</i> | 11.15 +/-<br>0.28 | 10.44 +/-<br>0.6  | 0.0952        | 9.66 +/-<br>0.32  | 10.5 +/-<br>0.21  | <b>0.0079</b> |
| <i>Serpina7</i>  | 6.2 +/-<br>0.45   | 4.3 +/- 1.38      | 0.0952        | 5.84 +/-<br>0.22  | 6.75 +/-<br>0.39  | <b>0.0159</b> |
| <i>Itih1</i>     | 9.65 +/-<br>0.08  | 9.28 +/-<br>0.16  | <b>0.0079</b> | 8.57 +/-<br>0.28  | 9.02 +/-<br>0.16  | <b>0.0159</b> |
| <i>Itih3</i>     | 10.45 +/-<br>0.3  | 8.77 +/-<br>1.15  | <b>0.0317</b> | 9.27 +/-<br>0.45  | 10.59 +/-<br>0.17 | <b>0.0079</b> |
| <i>Pdk4</i>      | 2.66 +/-<br>0.53  | 4.39 +/-<br>0.98  | <b>0.0159</b> | 4.75 +/-<br>0.85  | 4.59 +/-<br>0.63  | 0.8413        |
| <i>Pdia6</i>     | 3.76 +/-<br>0.43  | 3.44 +/-<br>0.63  | 0.4206        | 3.53 +/-<br>0.15  | 3.9 +/- 0.26      | <b>0.0317</b> |
| <i>Ttr</i>       | 11.34 +/-<br>0.48 | 10.55 +/-<br>0.85 | 0.2222        | 9.02 +/-<br>0.37  | 10.43 +/-<br>0.43 | <b>0.0079</b> |
| <i>Serpinc1</i>  | 10.67 +/-<br>0.15 | 10.37 +/-<br>0.36 | 0.1508        | 8.65 +/-<br>0.17  | 9.62 +/-<br>0.19  | 0.1508        |
| <i>Saa1</i>      | 12.98 +/-<br>1.74 | 9.74 +/-<br>3.28  | 0.0952        | 11.4 +/-<br>0.09  | 12.27 +/-<br>0.19 | <b>0.0079</b> |
| <i>Saa2</i>      | 12.09 +/-<br>2.24 | 8.36 +/-<br>3.45  | 0.0556        | 10.58 +/-<br>0.08 | 11.45 +/-<br>0.19 | <b>0.0079</b> |
| <i>Lipc</i>      | 6.1 +/-<br>0.61   | 4.62 +/-<br>1.08  | <b>0.0159</b> | 3.76 +/-<br>0.24  | 4.71 +/-<br>0.48  | <b>0.0159</b> |
| <i>Lcat</i>      | 8.65 +/-<br>0.08  | 7.72 +/-<br>0.47  | <b>0.0079</b> | 7.31 +/-<br>0.29  | 8.46 +/-<br>0.25  | <b>0.0079</b> |
| <i>Sult2a1</i>   | 4.94 +/-<br>1.21  | 5.63 +/-<br>1.28  | 0.6905        | 1.91 +/-<br>1.68  | 3.77 +/-<br>0.71  | <b>0.0159</b> |
| <i>Hamp</i>      | 10.39 +/-<br>0.48 | 9.48 +/-<br>0.59  | 0.0556        | 8.78 +/-<br>0.38  | 10.06 +/-<br>0.16 | <b>0.0079</b> |
| <i>Hyal3</i>     | 0.44 +/-<br>0.32  | 0.76 +/-<br>0.22  | 0.1508        | 0.55 +/-<br>0.14  | 0.15 +/-<br>0.06  | <b>0.0079</b> |
| <i>Hpn</i>       | 9.01 +/-<br>0.06  | 8.53 +/-<br>0.26  | <b>0.0159</b> | 7.15 +/-<br>0.31  | 7.3 +/- 0.16      | 0.6905        |
| <i>Orm1</i>      | 11.41 +/-<br>0.88 | 9.1 +/-1.68       | 0.0556        | 10.04 +/-<br>0.22 | 11.43 +/-<br>0.2  | <b>0.0079</b> |
| <i>Rhno1</i>     | 2.49 +/-<br>0.3   | 2.49 +/-<br>0.27  | >0.9999       | 3.55 +/-<br>0.14  | 3.01 +/-<br>0.29  | <b>0.0159</b> |
| <i>Mrlp55</i>    | 3.51 +/-<br>0.17  | 2.92 +/- 0.4      | <b>0.0159</b> | 2.52 +/-<br>0.19  | 3.22 +/-<br>0.18  | <b>0.0079</b> |
| <i>Tek</i>       | 2.92 +/-<br>0.46  | 3.22 +/-<br>0.73  | 0.8413        | 1.53 +/-<br>0.29  | 2.0 +/- 0.32      | <b>0.0317</b> |
